# Supplementary material
Source: PubMed Central journal article supplement (PMC6802502)
Supplement: supp_RA119.008420_144285_2_supp_379633_pwn3p1.pdf [file supp_RA119.008420_144285_2_supp_379633_pwn3p1.pdf]

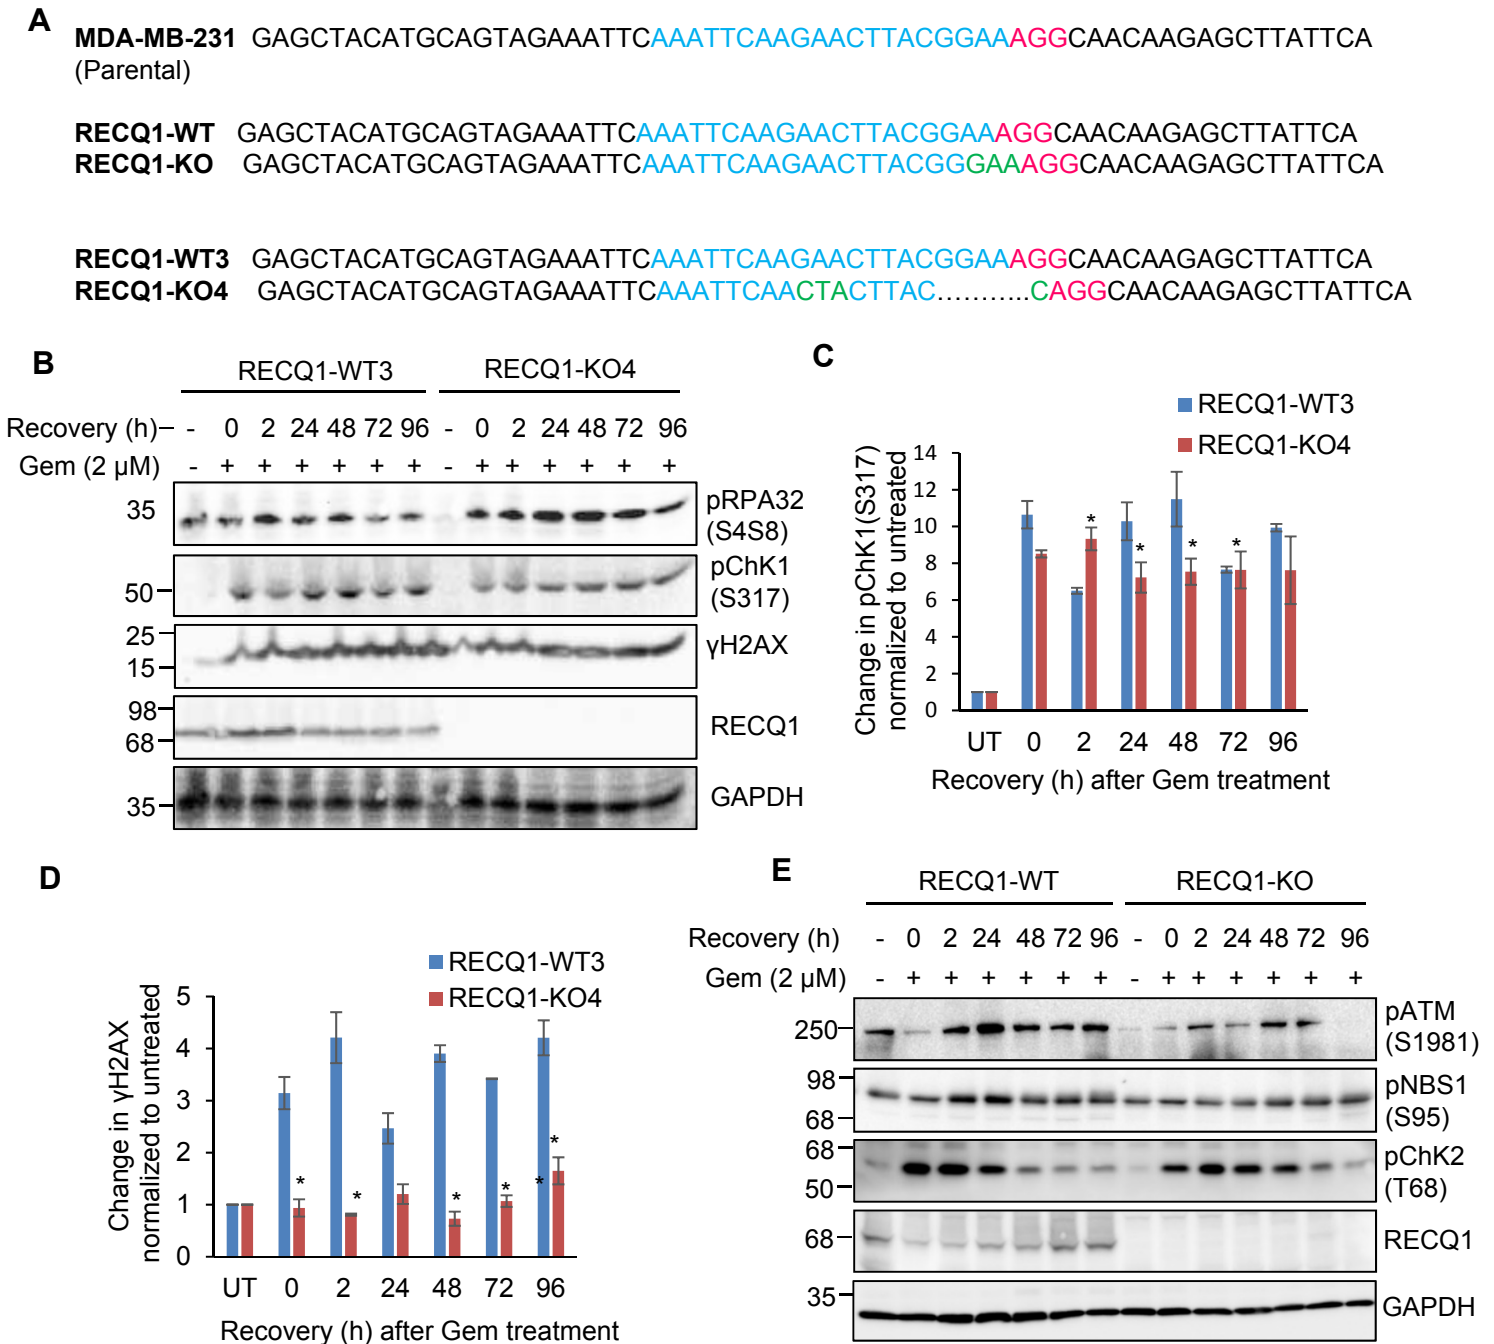

Figure S1

**Figure S1:** (A) Sequence information from individual clones at CRISPR-Cas9 target loci obtained by Sanger sequencing. The PAM sequence is shown in pink, target site is shown in blue and the change in sequences at target site in RECQ1-KO clones is indicated in green. (B) Western blot analysis of pRPA32(S4/S8), pChK1(S317),  $\gamma$ H2AX and RECQ1 in RECQ1-WT3/RECQ1-KO4 cells treated with gemcitabine (2  $\mu$ M for 2 h) followed by recovery in drug-free medium for the indicated time points. GAPDH is used as a loading control. (C) and (D) Quantitative representation of western blot signal intensities for pChK1(S317) and  $\gamma$ H2AX proteins (in panel B) using Image J. (E) Western blot analysis of pATM(S1981), pNBS1(S95) and pChK2(T68) in RECQ1-WT/RECQ1-KO cells treated with gemcitabine (2  $\mu$ M for 2 h) followed by recovery in drug-free medium at the indicated time points. Same cell lysates were used in Figure 3A. RECQ1 panel from Figure 3A is shown here to indicate RECQ1 protein status in RECQ1-WT and RECQ1-KO cell lysates. GAPDH is used as a loading control. Molecular mass (in kDa) is shown to the left of the Western blots.

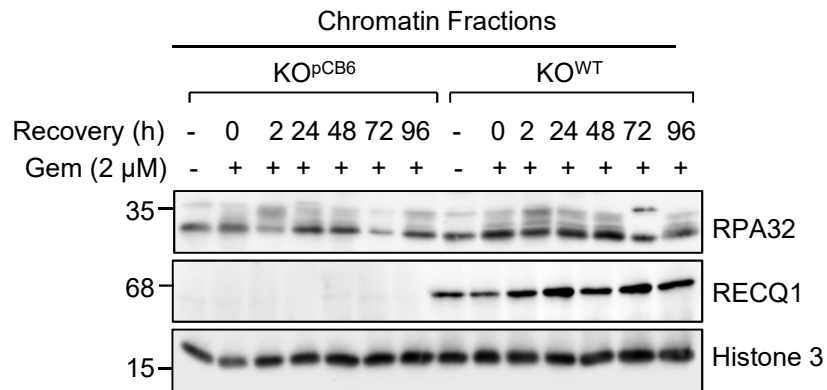

**Figure S2: Decreased RPA recruitment on chromatin in RECQ1-KO cells is rescued by complementation of wildtype RECQ1 (KO<sup>WT</sup>) upon gemcitabine treatment.** Western blot analysis of RPA32 and RECQ1 in chromatin enriched fractions of KO<sup>pCB6</sup> and KO<sup>WT</sup> cells treated with gemcitabine (2 μM for 2 h) followed by recovery in drug-free medium as indicated. Histone 3 is used as loading control. Molecular mass (in kDa) is shown to the left of the western blots.

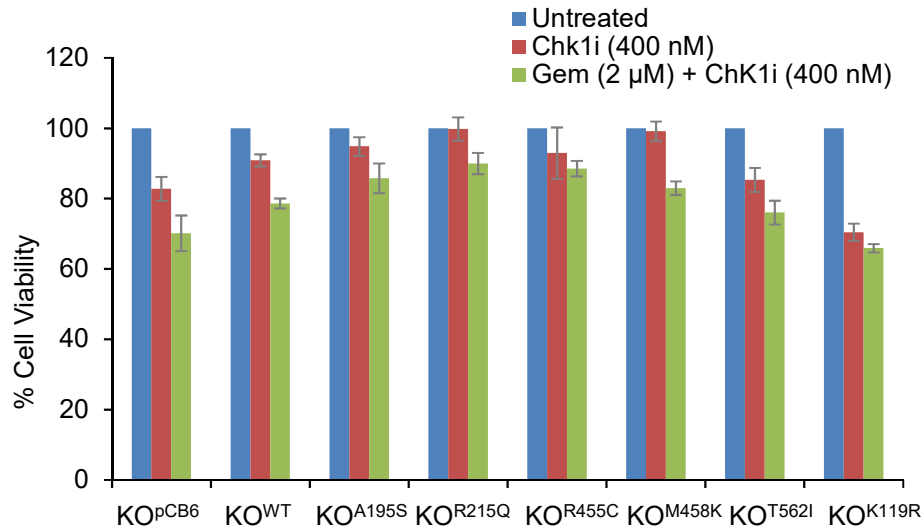

**Figure S3: Sensitivity to ChK1i alone or a combination of Gemcitabine ± ChK1i in RECQ1-KO cells complemented with vectors encoding RECQ1 wildtype or missense mutants.** For ChK1i treatment the cells were treated with ChK1i (400 nM for 24 h), for combination treatments, the cells were treated with gemcitabine (2 μM for 2 h) followed by subsequent treatment with ChK1i (400 nM for 24 h). Cell viability was measured by CCK-8 reagent and percent cell viability was calculated by normalizing to untreated.
